# Supplementary material for: Circulating microRNA profiles in plasma: identification of miR-224 as a novel diagnostic biomarker in hepatocellular carcinoma independent of hepatic function
Source: PubMed Central journal article supplement (PMC5288224; doi:10.18632/oncotarget.10781), 2016-07-22
Supplement: oncotarget-07-53820-s001.pdf [file oncotarget-07-53820-s001.pdf]

## Circulating microRNA profiles in plasma: identification of miR-224 as a novel diagnostic biomarker in hepatocellular carcinoma independent of hepatic function

### SUPPLEMENTARY FIGURES AND TABLES

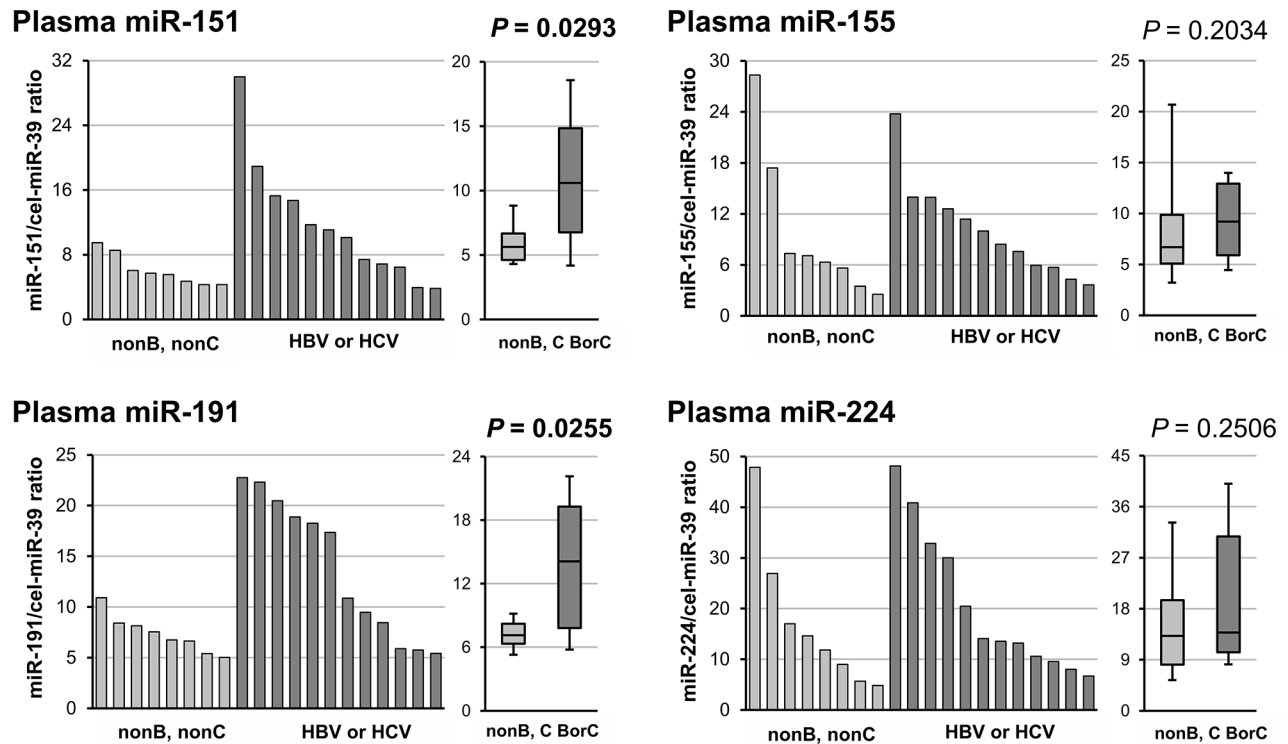

**Supplementary Figure S1: Small-scale analyses comparing the plasma levels of four candidate miRNAs between HCC patients with viral etiology and no viral etiology.** Plasma levels of the four candidate miRNAs in 20 HCC patients were analyzed using qRT-PCR, from the viewpoint of background hepatic disease. The plasma levels of miRNA-151 and miRNA-191 were significantly higher in the plasma of HCC patients with hepatitis B or C than in non-B, non-C patients.

**First cohort Plasma miR-224**

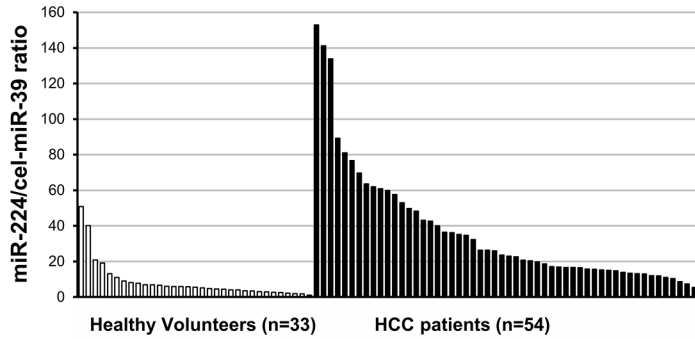

**$P < 0.0001$**

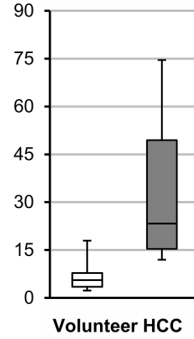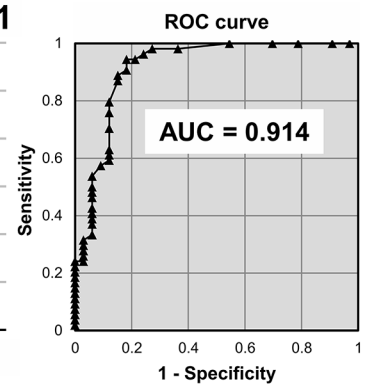

**Second cohort Plasma miR-224**

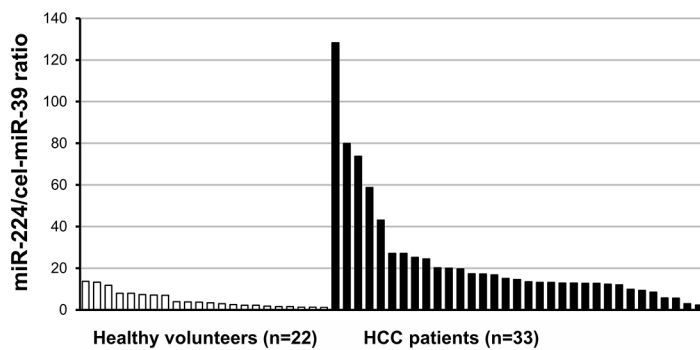

**$P < 0.0001$**

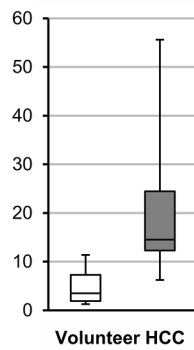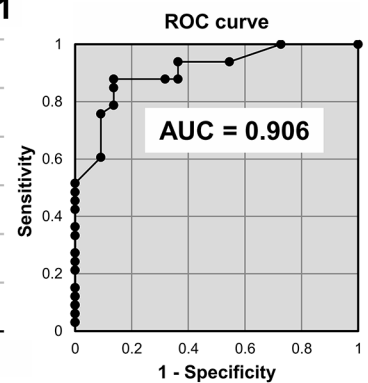

**Supplementary Figure S2: The high level of plasma miR-224 was validated in HCC patients in two independent cohorts.** The validation cohorts comprised samples from two independent institutes. In the two independent cohorts, the miR-224 plasma level was significantly higher in the HCC patients than in the healthy volunteers ( $P < 0.0001$ ). The results were nearly identical in each independent cohort and similar to large-scale validation cohorts.

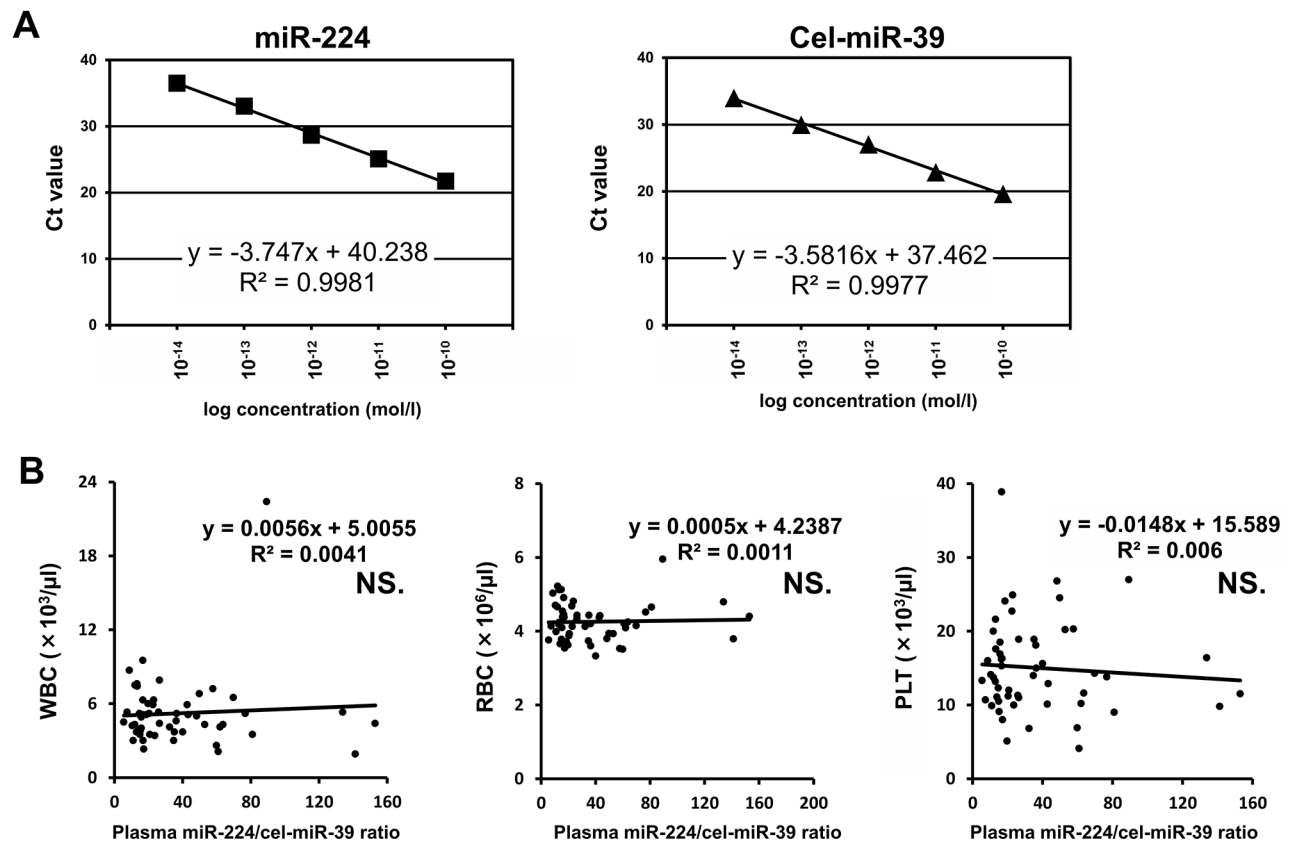

**Supplementary Figure S3:** **A.** Standard curves of miR-224 and cel-miR-39 using synthetic miRNAs. Ten-fold serial dilutions of synthetic miRNA were used to generate the standard curves. Linearity was confirmed within these concentrations. **B.** Evaluation of the correlation between the plasma level of miR-224 and peripheral blood cells. There were no significant correlation between the plasma miR-224 level and the number of any type of peripheral blood cell.

Supplementary Table S1: All candidate miRNAs and selected process

See Supplementary File 1

Supplementary Table S2: Association between plasma miR-224 level and clinicopathological characteristics in patients with HCC

| Variables                               | First cohort                      |                |                      |               | Second cohort  |                      |               |
|-----------------------------------------|-----------------------------------|----------------|----------------------|---------------|----------------|----------------------|---------------|
|                                         | n                                 | Plasma miR-224 |                      | n             | Plasma miR-224 |                      |               |
|                                         |                                   | Median         | P value <sup>a</sup> |               | Median         | P value <sup>a</sup> |               |
| Total                                   | 54                                | 23.26          |                      | 33            | 14.50          |                      |               |
| Gender                                  | male                              | 35             | 20.79                | 0.1408        | 24             | 14.77                | 0.3825        |
|                                         | female                            | 19             | 34.75                |               | 9              | 13.13                |               |
| Age (years old)                         | < 70                              | 22             | 22.74                | 0.4377        | 10             | 12.98                | 0.2941        |
|                                         | 70 ≤                              | 32             | 29.37                |               | 23             | 15.05                |               |
| BMI <sup>b</sup>                        | < 25                              | 38             | 26.14                | 0.2931        | 22             | 17.07                | 0.1565        |
|                                         | 25 ≤                              | 16             | 18.72                |               | 11             | 12.86                |               |
| DM <sup>c</sup>                         | Positive                          | 13             | 22.55                | 0.3116        | 12             | 14.96                | 0.4633        |
|                                         | Negative                          | 41             | 23.60                |               | 21             | 14.50                |               |
| Viral infection<br>(HBV or HCV)         | Positive                          | 37             | 26.37                | 0.4890        | 15             | 20.01                | 0.1609        |
|                                         | Negative                          | 17             | 22.55                |               | 18             | 14.00                |               |
| Liver cirrhosis                         | Positive                          | 17             | 22.93                | 0.4963        | 11             | 13.13                | 0.3886        |
|                                         | Negative                          | 37             | 23.60                |               | 22             | 14.77                |               |
| Pathological Type                       | Well <sup>d</sup>                 | 12             | 21.67                | 0.0699        | 11             | 12.68                | 0.0781        |
|                                         | Moderately or poorly <sup>e</sup> | 42             | 60.37                |               | 22             | 16.13                |               |
| Vascular invasion                       | Positive                          | 9              | 22.93                | 0.3529        | 5              | 13.50                | 0.4017        |
|                                         | Negative                          | 45             | 25.92                |               | 28             | 14.77                |               |
| Tumor size (mm)                         | < 20                              | 23             | 17.16                | <b>0.0066</b> | 12             | 12.15                | <b>0.0060</b> |
|                                         | 20 ≤                              | 31             | 36.21                |               | 21             | 19.69                |               |
| pStage<br>(LCSGJ <sup>f</sup> )         | I                                 | 21             | 18.61                | <b>0.0465</b> | 9              | 12.26                | 0.0578        |
|                                         | II-IV                             | 33             | 25.92                |               | 24             | 17.00                |               |
| pStage<br>(TNM:AJCC/UICC <sup>g</sup> ) | I                                 | 38             | 23.58                | 0.4702        | 24             | 16.13                | 0.3530        |
|                                         | II-IV                             | 16             | 23.27                |               | 9              | 13.50                |               |
| Recurrence                              | Positive                          | 19             | 34.75                | <b>0.0380</b> | 10             | 22.22                | <b>0.0232</b> |
|                                         | Negative                          | 35             | 18.61                |               | 23             | 13.10                |               |

a, Mann-Whitney U-test, NOTE : Significant values are indicated in bold; b, Body mass index; c, diabetes mellitus; d, well-differentiated hepatocellular carcinoma; e, moderately or poorly differentiated hepatocellular carcinoma; f, Liver Cancer Study Group of Japan; g, American Joint Committee on Cancer / International Union Against Cancer

Supplementary Table S3A: Association between plasma miR-224 level and types of recurrence in patients with HCC

| Recurrence pattern (Validation cohort)            | n  | Plasma miR-224 |                      |
|---------------------------------------------------|----|----------------|----------------------|
|                                                   |    | Median         | P value <sup>a</sup> |
| Total                                             | 29 | 25.22          |                      |
| Intrahepatic recurrence ( $\leq 3$ nodules)       | 20 | 25.79          | 0.1516               |
| Multiple intrahepatic recurrence ( $> 3$ nodules) | 7  | 40.05          |                      |
| Extrahepatic recurrence                           | 2  | 16.03          |                      |

a, The Kruskal-Wallis H-test

Supplementary Table S3B: Two independent cohort analysis

| Recurrence pattern                                | First cohort |                |                      | Second cohort |                |                      |
|---------------------------------------------------|--------------|----------------|----------------------|---------------|----------------|----------------------|
|                                                   | n            | Plasma miR-224 |                      | n             | Plasma miR-224 |                      |
|                                                   |              | Median         | P value <sup>a</sup> |               | Median         | P value <sup>a</sup> |
| Total                                             | 19           | 34.75          |                      | 10            | 22.22          |                      |
| Intrahepatic recurrence ( $\leq 3$ nodules)       | 14           | 35.47          | 0.1029               | 6             | 22.22          | 0.3041               |
| Multiple intrahepatic recurrence ( $> 3$ nodules) | 4            | 31.30          |                      | 3             | 79.90          |                      |
| Extrahepatic recurrence                           | 1            | 15.25          |                      | 1             | 16.82          |                      |

a, The Kruskal-Wallis H-test

Supplementary Table S4: The cut-off values of plasma miR-224 in minimum detectable tumor

| Plasma miR-224 cut-off value* | AUC          |               |
|-------------------------------|--------------|---------------|
|                               | First cohort | Second cohort |
| 9                             | 0.758        | 0.635         |
| 10                            | 0.740        | 0.686         |
| 11                            | 0.802        | 0.731         |
| 12                            | 0.689        | 0.702         |
| 13                            | 0.712        | 0.672         |

\*miR-224/cel-miR-39 ratio
